# Supplementary material
Source: publisher figshare collection journal article supplement (https://geolsoc.figshare.com/ndownloader/files/5427353)
Supplement: Supplementary file 1 [file 5427353]

Sample charts to accompany Neill et al. 'Origin of the Aves Ridge and Dutch-Venezuelan Antilles'.
New major and trace element data is shown for samples dredged in 1968 from scarps on the southeast corner of the Aves Ridge, Caribbean Sea.
Samples are stored at the Lamont-Doherty Earth Observatory Deep Sea Sample Repository.
Individual samples were generated from the remaining loose stores of rocks collected during each of three dredges.
*Sample 11317UPb was dated using U-Pb methods.
**See text for analytical details.
Cruise		1968 R/V Eastward (Duke University)
Dredge ID		EA68 11317	EA68 11317	EA68 11317	EA68 11317	EA68 11317	EA68 11317	EA68 11317	EA68 11317	EA68 11317	EA68 11317	EA68 11317	EA68 11319	EA68 11319	EA68 11319	EA68 11319	EA68 11319	EA68 11319	EA68 11319	EA68 11319	EA68 11319	EA68 11319	EA68 11319	EA68 11318	EA68 11318	EA68 11318	EA68 11318	EA68 11318	EA68 11318	EA68 11318	EA68 11318	EA68 11318	EA68 11318	EA68 11318
Latitude	deg/decimal	12.33	12.33	12.33	12.33	12.33	12.33	12.33	12.33	12.33	12.33	12.33	12.35	12.35	12.35	12.35	12.35	12.35	12.35	12.35	12.35	12.35	12.32	12.32	12.32	12.32	12.32	12.32	12.32	12.32	12.32	12.32	12.32	12.32
Longitute	deg/decimal	-63.5	-63.5	-63.5	-63.5	-63.5	-63.5	-63.5	-63.5	-63.5	-63.5	-63.5	-63.55	-63.55	-63.55	-63.55	-63.55	-63.55	-63.55	-63.55	-63.55	-63.55	-63.45	-63.45	-63.45	-63.45	-63.45	-63.45	-63.45	-63.45	-63.45	-63.45	-63.45	-63.45
Water depth	m	1839-1950	1839-1950	1839-1950	1839-1950	1839-1950	1839-1950	1839-1950	1839-1950	1839-1950	1839-1950	1839-1950	1086-1151	1086-1151	1086-1151	1086-1151	1086-1151	1086-1151	1086-1151	1086-1151	1086-1151	1086-1151	1197-1345	1197-1345	1197-1345	1197-1345	1197-1345	1197-1345	1197-1345	1197-1345	1197-1345	1197-1345	1197-1345	1197-1345
Number		317UPb*	317a	317b	317c	317d	317e	317f	317g	317h	317i	317j	319a	319b	319c	319d	319e	319f	319g	319h	319i	319j	318j	318a	318b	318c	318d	318e	318f	318g	318h	318i	318k	318l
Rock type		granitoid	granitoid	granitoid	granitoid	granitoid	granitoid	granitoid	granitoid	granitoid	granitoid	granitoid	granitoid	granitoid	granitoid	granitoid	granitoid	granitoid	granitoid	granitoid	granitoid	granitoid	granitoid	mafic	mafic	mafic	mafic	mafic	mafic	mafic	mafic	mafic	mafic	mafic
Elemental data**
Majors
SiO2		63.43	68.13	69.56	69.58	69.98	69.61	68.65	69.95	67.3	68.01	67.37	70.32	72.26	71.06	70.64	70.95	69.86	72.06	71.7	70.68	71.9	70.49	43.41	44.99	49.75	52.88	49.32	44.18	54.02	55.83	34.39	57.12	53.15
TiO2		0.41	0.43	0.41	0.43	0.39	0.39	0.42	0.37	0.42	0.44	0.42	0.37	0.38	0.38	0.4	0.39	0.38	0.41	0.37	0.36	0.34	0.44	0.63	0.59	0.74	0.68	0.79	0.52	0.68	0.7	0.57	0.65	0.58
Al2O3		13.29	15.23	14.59	14.85	14.74	14.09	14.37	14.28	15.4	15.36	15.34	13.28	13.62	12.59	13.5	14.12	12.9	13.63	12.91	13.17	13.37	13.29	20.49	22.43	16.79	13.98	17.06	11.17	14.73	16.45	11.15	14.21	13.07
Fe2O3T		3.58	3.92	3.85	3.5	3.45	3.69	3.8	3.63	3.56	3.43	3.79	3.53	3.46	3.42	3.5	4.27	4.02	3.44	3.22	3.23	3.21	3.91	10.04	8.72	12.14	9.53	9.85	7.03	8.58	7.59	9.63	5.19	10.36
MnO		0.59	0.08	0.09	0.07	0.08	0.07	0.12	0.11	0.09	0.08	0.1	0.11	0.12	0.1	0.11	0.14	0.11	0.11	0.12	0.09	0.09	0.07	0.21	0.15	0.5	0.49	0.44	1.11	0.41	0.38	0.88	0.4	0.37
MgO		1.38	1.29	1.26	1.22	1.27	1.2	1.23	1.23	1.17	1.26	1.26	0.97	1.06	1.06	1.09	1.35	1.34	1.06	1.02	0.98	0.87	1.28	5.52	4.58	2.56	1.11	2.47	1.92	1.35	2.13	5.07	1.54	1.47
CaO		5.59	3.61	2.48	3.51	2.92	2.61	2.78	1.95	3.15	2.81	2.99	3.04	2.82	1.59	3.12	1.63	1.6	3.35	2.54	2.89	2.78	3.17	7.42	7.19	2.05	4.76	3.18	13.13	3.69	1.57	17.3	4.04	4.6
Na2O		4.08	3.84	4.27	3.85	4.28	4.01	4.01	4.37	4.12	4.28	4.21	3.27	3.94	4.2	3.38	4.68	3.78	3.28	3.27	3.45	3.47	3.47	3.85	3.68	0.17	0.19	0.16	0.32	0.26	0.25	1.33	0.17	0.24
K2O		2.53	2.35	2.63	2.53	2.32	2.36	2.49	2.89	2.53	2.59	2.6	2.72	1.93	2.58	2.72	1.12	2.7	2.61	3.08	2.59	2.18	2.36	1.28	1.44	10.14	10.09	10.06	7.31	10.56	10.36	2.06	10.73	8.74
P2O5		0.17	0.17	0.18	0.17	0.16	0.15	0.16	0.15	0.15	0.15	0.15	0.17	0.17	0.17	0.18	0.19	0.19	0.17	0.17	0.17	0.14	0.22	0.2	0.24	1.09	1.73	0.86	2.97	1.8	0.78	1.24	0.73	1.61
LOI		4.7	0.99	1.47	1.04	1.16	1.23	1.43	1.83	1.06	1.07	1.17	1.11	1.25	1.55	1.14	1.69	1.97	1.04	1.1	1.09	0.98	0.99	7.09	5.29	3.54	4.77	5.24	10.2	3.45	2.99	15.21	5.37	4.86
Total		99.77	100.05	100.8	100.75	100.75	99.41	99.45	100.75	98.96	99.47	99.4	98.88	101	98.7	99.79	100.53	98.86	101.15	99.5	98.71	99.32	99.69	100.12	99.3	99.47	100.19	99.43	99.86	99.54	99.03	98.84	100.14	99.06
Traces
Sc		10	9.9	9.9	9.7	10	8.8	10.1	9.2	10	8.9	10.3	7.8	8.4	8.3	9	8.7	8.4	8.2	7.9	8.8	7.8	10.2	22.4	21.9	36.5	33.6	41.2	26.5	33	36.4	24.4	34.3	28.2
V		76	78	77.4	67.2	75.5	70.5	70.8	71	70.1	71.4	73.7	65.8	58.4	64.1	67.4	67	71.3	66.7	62.3	65.3	58.8	74.2	251.4	200	359.6	303.1	385.8	253.5	288.3	268.2	275.9	243.7	302
Cr		20.5	9.9	6.1	4.8	9	17.2	6	20.4	6.3	8.2	13.4	22.6	8.1	4.8	11.7	3.8	5.8	5.1	3.5	15	21.1	5.9	8.6	12.5	94.4	58.5	68.2	66.5	71.4	71.3	21.8	103.7	59.2
Co		7.9	6.7	6.8	6.5	6.1	5.9	6.4	5.7	5.8	6	6.1	4.7	5	5.2	6	6.2	6.2	6.4	5.6	5.4	5	6.7	30.7	22.6	30.1	16.7	23.3	44.5	19.9	19.8	33.5	21.8	14.1
Ni		28.4	8.1	1.3	2	1.5	0.2	1.5	1.6	41.2	5.7	2	15	0.3	1.5	1.3	12.8	17	5.4	7.5	16.8	0.3	6	48.9	34.4	102.7	137	89.8	256	84.9	85.6	146.6	174.2	95.6
Cu		16.8	16.6	12.9	13.6	11.8	11.4	9.6	19.4	14.7	12.1	12.2	40	16	13.2	12.7	19.7	23.6	22.9	18.4	24.7	18.1	32.7	107.9	115.2	101.6	115.2	135.7	94.6	103.7	128.9	147.7	97.1	91.2
Ga		12.2	12.6	13.2	13.4	12.9	12.3	12.5	12.3	12.9	12.6	12.6	12.4	11.4	10.5	12.1	11.9	11.4	12.5	11.6	12.1	11.2	11.9	15.2	16	14.6	7.8	18.2	9.3	9.7	11.6	12.5	11	9.2
Rb		32.7	26.4	32.8	30.2	24.4	24.9	31.3	31.1	30.5	29.3	30.1	34.6	22.9	23.4	32.6	16.9	27.4	31.3	32.7	33	31.3	21.9	20.5	18	99	82.1	106.1	75.8	90.5	90.3	19.5	94.7	78.1
Sr		904.1	405.4	367.6	424	404.5	384.5	382.7	444.3	402.1	413.3	391.2	379.1	348.8	261.6	387.1	327.4	320.6	401.3	356.6	390.8	324.7	407.2	619.2	903	106.3	152.1	123.7	335.9	143.9	89.2	289.3	117.1	141.8
Y		21.3	19.8	21.2	21.2	21	19.3	20.1	19.1	18.4	17.5	22.8	16.9	16.8	17.4	18.2	16.9	19.6	16.8	17	18.2	16.4	17	13.6	14.1	34.4	25.5	33.7	30.3	25.4	26.5	23.8	26.4	26.7
Zr		117.3	127.2	143.4	160.2	138	137.1	128.5	128.5	114.7	118.8	122.3	124.3	118.7	113.3	138.2	120.3	127.6	98.6	112.9	102.7	102.3	129.3	29.5	31.8	64.7	58.5	74.9	35.1	52	85.5	42.9	93.5	53.4
Nb		5.5	4.13	3.93	4.69	4.67	4.5	4.39	4.33	4.07	4.2	4.65	4.35	4.11	3.92	4.78	4.37	4.85	4.45	3.98	4.12	4.4	3.96	1.16	1.12	4.75	3.78	5.08	3.7	3.99	4.41	1.96	4.88	3.74
Ba		702	697.9	742.9	782.8	823.1	882.8	788.9	904	790.5	833.2	806.9	803.8	469.1	889.8	772.1	197.1	1094.9	789.4	1029.3	780.8	686.7	803.7	229.5	423.5	6192.6	5698.9	5868.3	5130.6	5929.7	6259.6	977.6	6755.1	5314.7
Hf		3.4	2.94	3.22	3.57	3.13	3.14	2.94	2.94	2.68	2.66	2.83	2.93	2.75	2.64	3.24	2.91	2.93	2.34	2.6	2.5	2.46	2.81	0.76	0.83	1.62	1.39	1.83	0.69	1.17	2.05	1.01	2.23	1.17
Ta		0.4	0.29	0.33	0.36	0.33	0.31	0.31	0.3	0.33	0.27	0.33	0.32	0.32	0.3	0.36	0.33	0.35	0.31	0.33	0.32	0.33	0.23	0.07	0.07	0.33	0.28	0.36	0.24	0.29	0.3	0.11	0.31	0.26
Pb		3.1	3.21	3.95	3	3.38	3.49	2.9	3.1	2.62	4.49	3.13	3.22	3.39	4.63	3.22	3.09	3.19	4.1	4.04	3.46	10.04	3.85	3.47	1.8	30.07	30.8	13.95	31.09	20.53	22.01	18.29	14.14	17.37
Th		2.5	1.86	1.92	2.01	1.82	1.85	2.18	1.89	1.94	1.6	1.61	2.75	1.83	1.91	2.1	1.99	1.83	1.72	1.48	1.71	1.93	1.21	0.58	0.3	1.78	1.55	1.88	1.67	1.6	1.72	0.9	2.07	1.86
U		1.3	0.81	0.91	0.95	0.94	0.82	0.84	0.81	0.83	0.66	0.75	0.77	0.65	0.66	0.73	0.62	0.72	0.66	0.73	0.72	0.62	0.6	0.32	0.24	2.65	4.12	1.8	34.88	2.44	3.62	0.87	3.16	3.46
REEs
La		15.1	13.91	15.07	15.35	14.77	15.56	13.25	12.63	11.97	12.35	12.35	11.59	12.57	13.62	12.64	10.54	13.47	13.26	12.62	13.66	11.8	10.63	4.29	4.81	14.93	15.64	18.72	16.08	14.91	15.26	10.68	16.03	16.04
Ce		34.4	30.79	33.14	33.93	32.67	34.24	29.37	27.94	26.33	27.19	27.71	25.29	27.48	29.99	27.73	23.92	30.03	28.91	28.79	30.29	25.81	24.02	10.83	11.69	33.69	23.73	28.07	19.88	24.76	27.37	18.19	31.12	24.26
Pr		4.52	4.11	4.39	4.46	4.3	4.48	3.94	3.7	3.55	3.64	3.82	3.36	3.58	3.91	3.69	3.22	3.92	3.75	3.72	3.95	3.37	3.31	1.56	1.81	5.48	3.57	4.36	3.51	3.85	4.4	3.04	4.65	4
Nd		19.3	17.47	18.72	18.77	18.37	18.76	16.76	15.78	15.29	15.52	16.7	14.28	14.89	16.17	15.54	13.82	16.69	15.77	15.68	16.64	14.2	14.49	7.69	8.94	25.77	16.21	20.05	15.74	17.04	19.93	14.41	20.87	17.72
Sm		3.81	3.74	3.98	3.95	3.92	3.9	3.57	3.41	3.27	3.3	3.8	2.98	3.06	3.25	3.29	3.05	3.44	3.14	3.18	3.34	2.9	3.13	2.06	2.33	5.97	3.77	4.86	3.46	3.76	4.37	3.38	4.64	3.95
Eu		0.91	1.05	1.11	1.1	1.09	1.06	1.05	0.98	1.05	1.03	1.08	0.93	0.86	0.95	0.96	0.87	0.99	0.96	0.97	0.95	0.85	1.06	0.72	0.83	2.93	1.43	1.71	1.34	1.51	1.68	1.12	1.79	1.57
Gd		3.48	3.31	3.52	3.5	3.46	3.32	3.26	3.08	2.94	2.93	3.56	2.76	2.72	2.93	2.93	2.75	3.2	2.82	2.84	2.99	2.66	2.88	2.07	2.33	5.76	3.63	4.77	3.55	3.6	4.08	3.41	4.4	3.8
Tb		0.57	0.48	0.51	0.52	0.51	0.48	0.49	0.46	0.44	0.43	0.54	0.41	0.4	0.42	0.44	0.42	0.46	0.4	0.41	0.43	0.38	0.43	0.33	0.36	0.76	0.54	0.72	0.51	0.52	0.57	0.5	0.63	0.56
Dy		3.3	2.97	3.18	3.19	3.15	2.96	3.06	2.88	2.79	2.69	3.49	2.59	2.54	2.68	2.74	2.62	2.91	2.53	2.62	2.67	2.44	2.61	2.17	2.32	4.33	3.44	4.62	3.24	3.28	3.51	3.08	3.84	3.5
Ho		0.68	0.59	0.63	0.62	0.62	0.58	0.6	0.57	0.55	0.53	0.69	0.52	0.5	0.52	0.55	0.52	0.58	0.49	0.51	0.53	0.48	0.52	0.43	0.45	0.8	0.69	0.94	0.68	0.67	0.7	0.6	0.75	0.69
Er		2.1	1.8	1.94	1.95	1.91	1.75	1.87	1.75	1.7	1.62	2.11	1.57	1.56	1.61	1.69	1.57	1.76	1.51	1.58	1.66	1.49	1.57	1.28	1.32	2.2	2.07	2.84	2.1	1.97	2.06	1.72	2.21	1.99
Tm		0.33	0.31	0.33	0.33	0.32	0.3	0.31	0.3	0.29	0.27	0.36	0.26	0.26	0.27	0.28	0.26	0.3	0.25	0.26	0.27	0.25	0.26	0.2	0.21	0.33	0.32	0.45	0.34	0.31	0.32	0.26	0.35	0.31
Yb		2.25	2.04	2.25	2.25	2.17	2.04	2.16	2.04	2.01	1.87	2.46	1.83	1.84	1.88	1.97	1.84	2.1	1.74	1.88	1.93	1.77	1.75	1.36	1.39	2.06	2.06	2.91	2.29	1.95	2.14	1.7	2.24	1.98
Lu		0.37	0.34	0.38	0.38	0.36	0.34	0.36	0.34	0.33	0.3	0.41	0.31	0.31	0.32	0.34	0.31	0.35	0.29	0.31	0.32	0.29	0.3	0.22	0.22	0.32	0.34	0.47	0.4	0.32	0.35	0.27	0.36	0.32
